# Supplementary material for: Two isomeric zeolite-like metal–organic frameworks with mechanically responsive luminescence emission and gas adsorption properties
Source: Royal Society of Chemistry journal article supplement (doi:10.1039/d1ce00464f), 2021-01-01
Supplement: d1ce00464f1.pdf [file d1ce00464f1.pdf]

## **Two isomeric zeolite-like metal-organic frameworks with mechanically responsive luminescence emission and gas adsorption property**

Shuang Peng,<sup>a‡</sup> Yan-Jie Qi,<sup>a‡</sup> Xin-Hao Li,<sup>b</sup> Cai Sun,<sup>a</sup> Ling-Yun Li,<sup>b\*</sup> Xin-Xiong Li,<sup>a\*</sup> Shou-Tian Zheng,<sup>a</sup> Qichun Zhang <sup>c\*</sup>

<sup>a</sup> *State Key Laboratory of Photocatalysis on Energy and Environment, College of Chemistry, Fuzhou University, Fuzhou, Fujian 350108, China.*

<sup>b</sup> *Key Laboratory of Eco-materials Advanced Technology, College of Materials Science and Engineering, Fuzhou University, Fuzhou, Fujian 350108, China.*

<sup>c</sup> *School of Materials Science and Engineering, Nanyang Technological University, 50 Nanyang Avenue, 639798, Singapore (Singapore).*

### **This file includes:**

**Section S1** Synthesis and Methods

**Section S2** Additional Table

**Section S3** Additional Figures

**Section S4** References

## Section S1 Synthesis and Methods

**Materials and General methods:** All the reagents and solvents were procured from commercial sources and were used without further purification. The H<sub>3</sub>TPO ligands were prepared according to the previously described procedures. Powder X-ray diffraction (PXRD) analyses were recorded on a Rigaku Ultima IV diffractometer with Cu K $\alpha$  radiation ( $\lambda = 1.54051 \text{ \AA}$ ). Elemental analyses (EA) of C, H and N were carried out based on a Vario MICRO elemental analyzer. Thermal stability were studied by using a Mettler Toledo TGA/SDTA 851e analyzer under an air-flow atmosphere at a heating rate of 10 °C/min with the temperatures ranging from 30 °C to 1000 °C. The IR was experimented on the Nicolet iS50 at room temperature. The solid-state luminescence emission/excitation spectra were recorded on an Edinburgh Instrument FLS920 fluorescence spectrophotometer equipped with a continuous Xe-900 xenon lamp and a F900 microsecond flash lamp. Single-component gas adsorption measurements were performed with an Accelerated Surface Area and Porosimetry 2020 (ASAP 2020) surface area analyzer. All gases were used in the adsorption experiment of 99.999% purity or higher. The crystal morphology analyses were performed using a Hirox SH-4000 M type desktop scanning electron microscope.

**Synthesis of [(CH<sub>3</sub>)<sub>2</sub>NH<sub>2</sub>][Cd(TPO)] (1- $\alpha$ ):** CdCl<sub>2</sub>·2<sup>1/2</sup>H<sub>2</sub>O (47.3 mg), H<sub>3</sub>TPO (20.4 mg) were added to 5 mL NMF and 1 mL CH<sub>3</sub>CN in a 20 mL vial, and the mixture was stirred for 1 hour. Then, the reactants were sealed and heated at 100 °C for 5 days. After cooling to room temperature, colorless stick crystals were obtained after the solid products were washed with CH<sub>3</sub>CN (5 mL) for three times. The yield is about 12% based on H<sub>3</sub>TPO. Elemental analysis (%) calcd for C<sub>23</sub>H<sub>20</sub>CdNO<sub>7</sub>P (565.79): C, 48.82; H, 3.56; N, 2.48; found: C, 49.16; H, 3.97; N, 2.23.

**Synthesis of [(CH<sub>3</sub>)<sub>2</sub>NH<sub>2</sub>][Cd(TPO)] (1- $\beta$ ):** CdCl<sub>2</sub>·2<sup>1/2</sup>H<sub>2</sub>O (46.8 mg), H<sub>3</sub>TPO (20.9 mg) were added to 2 mL NMF, 3 mL CH<sub>3</sub>CN, and 1 mL deionized water in a 20 mL vial, and the mixture was stirred for 1 hour. Then, the reactants were sealed and heated at 100 °C for 5 days. After cooling to room temperature, colorless stick crystals were obtained after the solid products were washed with CH<sub>3</sub>CN (5 mL) for three times. The yield is about 12% based on H<sub>3</sub>TPO. Elemental analysis (%) calcd for C<sub>23</sub>H<sub>20</sub>CdNO<sub>7</sub>P (565.79): C, 48.82; H, 3.56; N, 2.48; found: C, 48.66; H, 3.27; N, 2.17.

**Single-crystal structure analysis:** Single-crystal X-ray diffraction data of **1- $\alpha$**  and **1- $\beta$**  were collected on Bruker Apex Duo CCD diffractometer with a graphite-monochromatized Mo  $K\alpha$  radiation ( $\lambda = 0.71073 \text{ \AA}$ ) operating at 175(2) K. The structures of **1- $\alpha$**  and **1- $\beta$**  were solved through direct methods and refined by full-matrix least-squares refinements based on  $F^2$  adopting the SHELX-2014 program package. The contribution of disordered solvent molecules to the overall intensity data of structures were treated using the SQUEEZE method in PLATON. All non-H atoms were located with successive difference Fourier syntheses and refined anisotropically. Crystallographic data and structure refinements for **1- $\alpha$**  and **1- $\beta$**  are summarized in [Table S1](#). CCDC 2063858 and 2063859 contain supplementary crystallographic data for this paper. These data can be obtained free of charge from The Cambridge Crystallographic Data Centre via [www.ccdc.cam.ac.uk/data\\_request/cif](http://www.ccdc.cam.ac.uk/data_request/cif).

## Section S2 Additional Table

**Table S1** Crystal data and structure refinement for compounds **1- $\alpha$**  and **1- $\beta$** .

| name code                                  | <b>1-<math>\alpha</math></b>                                                   | <b>1-<math>\beta</math></b>                                                    |
|--------------------------------------------|--------------------------------------------------------------------------------|--------------------------------------------------------------------------------|
| formula                                    | C <sub>21</sub> H <sub>12</sub> CdO <sub>7</sub> P                             | C <sub>21</sub> H <sub>12</sub> CdO <sub>7</sub> P                             |
| Fw (g/mol)                                 | 519.68                                                                         | 519.68                                                                         |
| temperature (K)                            | 175(2)                                                                         | 175(2)                                                                         |
| $\lambda$ , (Å)                            | 1.54178                                                                        | 0.71073                                                                        |
| cryst syst                                 | Orthorhombic                                                                   | Monoclinic                                                                     |
| space group                                | <i>Pbca</i> (# 61)                                                             | <i>P2<sub>1</sub>c</i> (# 14)                                                  |
| a, (Å)                                     | 23.728(3)                                                                      | 15.135(4)                                                                      |
| b, (Å)                                     | 13.165(2)                                                                      | 22.7028(5)                                                                     |
| c, (Å)                                     | 30.085(6)                                                                      | 18.370 (4)                                                                     |
| $\beta$ , (o)                              | 90                                                                             | 101.248(4)                                                                     |
| V, (Å <sup>3</sup> )                       | 9398(3)                                                                        | 6007(2)                                                                        |
| Z                                          | 8                                                                              | 8                                                                              |
| $\rho_{\text{calcd}}$ (g/cm <sup>3</sup> ) | 0.735                                                                          | 1.251                                                                          |
| F(000)                                     | 2056                                                                           | 2272                                                                           |
| crystal size (mm)                          | 0.15 × 0.13 × 0.06                                                             | 0.12 × 0.06 × 0.05                                                             |
| theta range (o)                            | 1.894~25.061                                                                   | 1.654 ~ 25.089                                                                 |
| limiting indices                           | -28 ≤ h ≤ 27,<br>-15 ≤ k ≤ 15,<br>-32 ≤ l ≤ 35                                 | -13 ≤ h ≤ 18,<br>-17 ≤ k ≤ 26,<br>-21 ≤ l ≤ 14                                 |
| R <sub>int</sub>                           | 0.0390                                                                         | 0.0443                                                                         |
| Goof                                       | 0.997                                                                          | 1.004                                                                          |
| R [ $I > 2\sigma$ ]                        | R <sub>1</sub> <sup>a</sup> = 0.0456,<br>wR <sub>2</sub> <sup>b</sup> = 0.1368 | R <sub>1</sub> <sup>a</sup> = 0.0440,<br>wR <sub>2</sub> <sup>b</sup> = 0.1110 |
| R (all data)                               | R <sub>1</sub> <sup>a</sup> = 0.0562,<br>wR <sub>2</sub> <sup>b</sup> = 0.1425 | R <sub>1</sub> <sup>a</sup> = 0.0850,<br>wR <sub>2</sub> <sup>b</sup> = 0.1190 |

<sup>a</sup> $R_1 = \sum ||F_o| - |F_c|| / \sum |F_o|$ . <sup>b</sup> $wR_2 = [\sum w(F_o^2 - F_c^2)^2 / w(F_o^2)]^{1/2}$ ,  $w = 1 / [\sigma^2(F_o^2) + (xP)^2 + yP]$ ,  $P = (F_o^2 + 2F_c^2) / 3$ , where  $x = 0.0883$ ,  $y = 4.4049$  for **1- $\alpha$** ;  $x = 0.0704$ ,  $y = 0$  for **1- $\beta$** .

**Table S2** The angles of the tetrahedral nodes in compounds **1- $\alpha$**  and **1- $\beta$** .

| compound <b>1-<math>\alpha</math></b>   |                                          | compound <b>1-<math>\beta</math></b>    |                                          |
|-----------------------------------------|------------------------------------------|-----------------------------------------|------------------------------------------|
| The angles of the Cd <sup>2+</sup> node | The angles of the TPO <sup>3-</sup> node | The angles of the Cd <sup>2+</sup> node | The angles of the TPO <sup>3-</sup> node |
| 76.919°                                 | 98.123°                                  | 74.857°                                 | 85.945°                                  |
| 99.694°                                 | 103.081°                                 | 94.130°                                 | 101.205°                                 |
| 103.005°                                | 105.785°                                 | 109.680°                                | 105.286°                                 |
| 121.243°                                | 107.357°                                 | 119.084°                                | 114.430°                                 |
| 123.764°                                | 117.514°                                 | 123.750°                                | 119.704°                                 |
| 129.087°                                | 122.311°                                 | 129.003°                                | 131.640°                                 |

Section S3 Additional Figures

a)

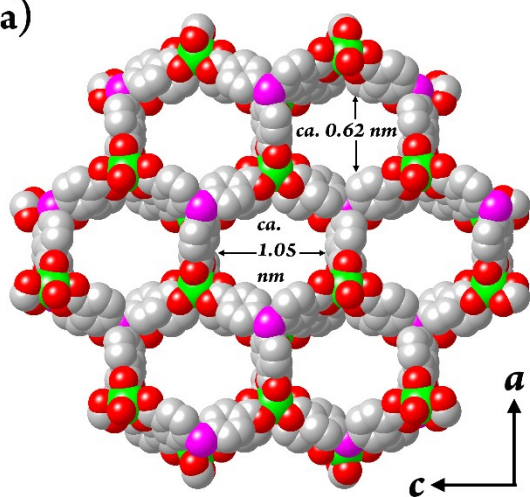

b)

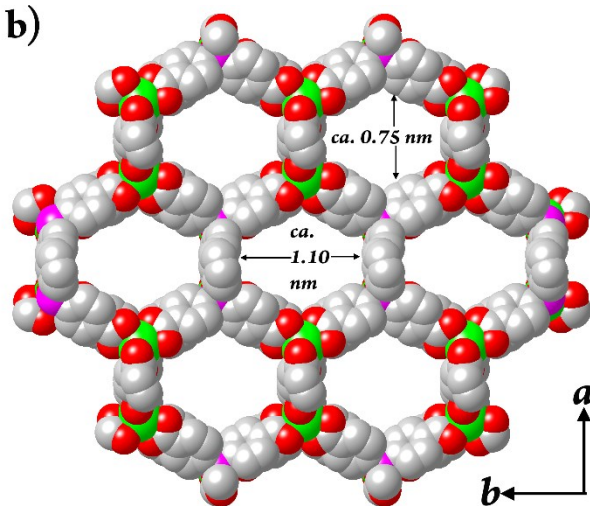

c)

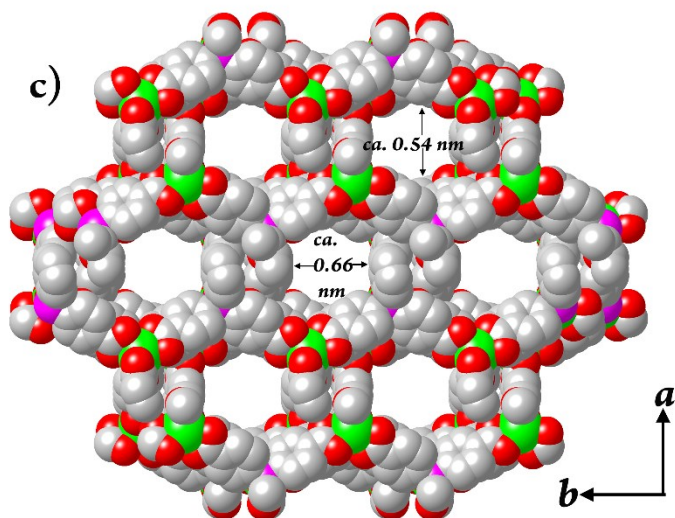

Fig. S1. The sizes of channels in **1- $\alpha$**  and **1- $\beta$** , a) the framework of **1- $\alpha$** ; b-c) the framework of **1- $\beta$**  before and after interpenetration.

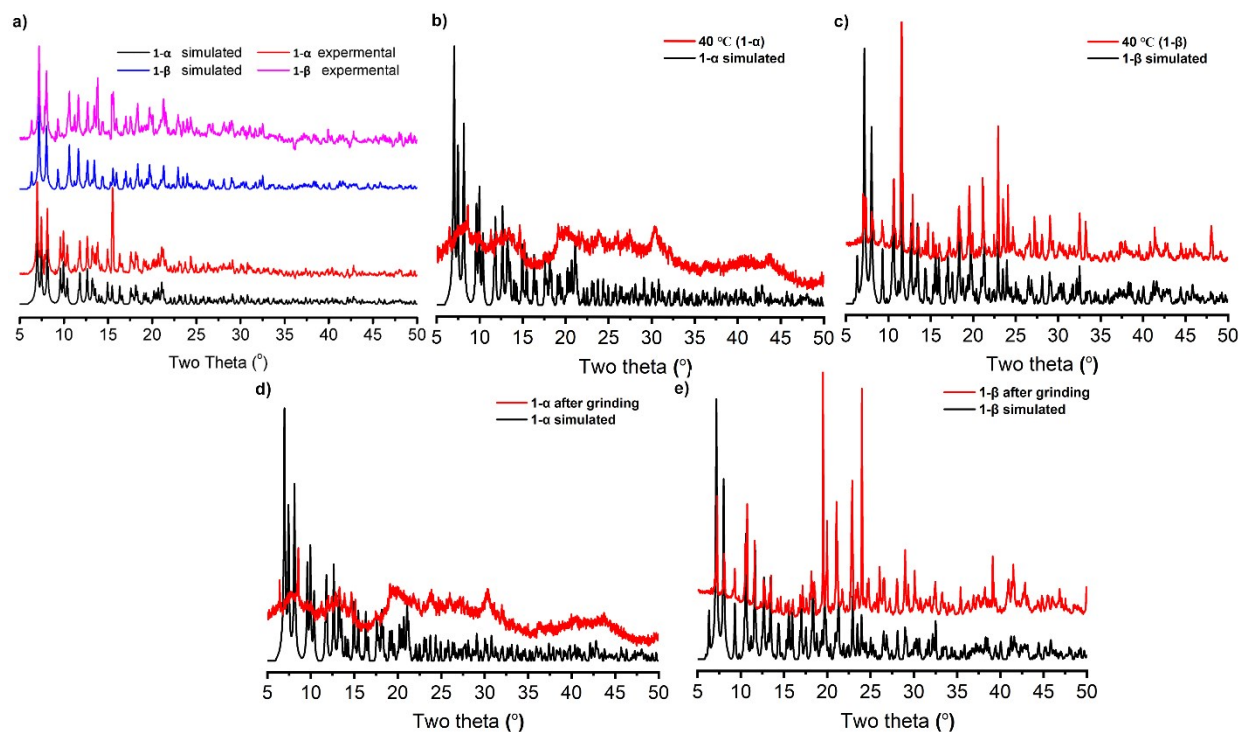

**Fig. S2.** (a) The theoretical simulated and experimental PXRD patterns of **1- $\alpha$**  and **1- $\beta$**  at room temperature; (b) The theoretical simulated and PXRD patterns of **1- $\alpha$**  at 40°C; (c) The theoretical simulated and PXRD patterns of **1- $\beta$**  at 40°C; (d) The theoretical simulated and PXRD patterns of **1- $\alpha$**  after grinding; (e) The theoretical simulated and PXRD patterns of **1- $\beta$**  after grinding.

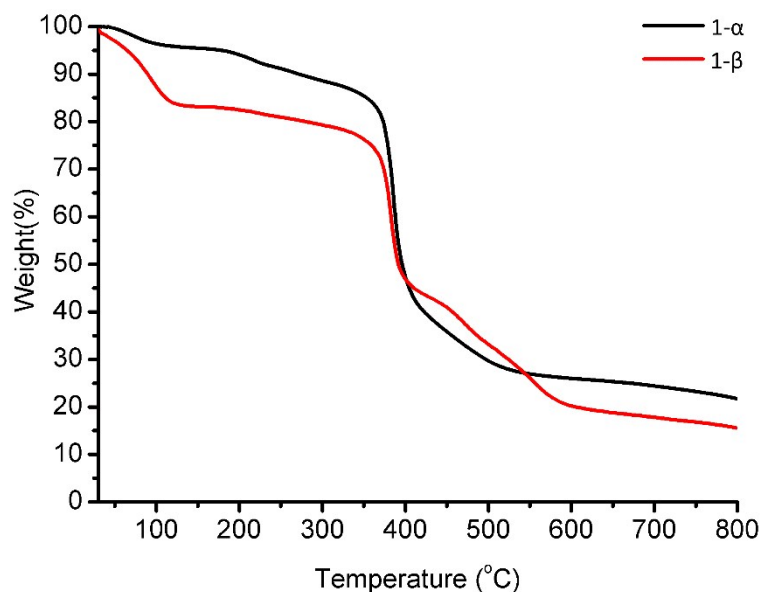

**Fig. S3.** The TG curves of **1- $\alpha$**  and **1- $\beta$** .

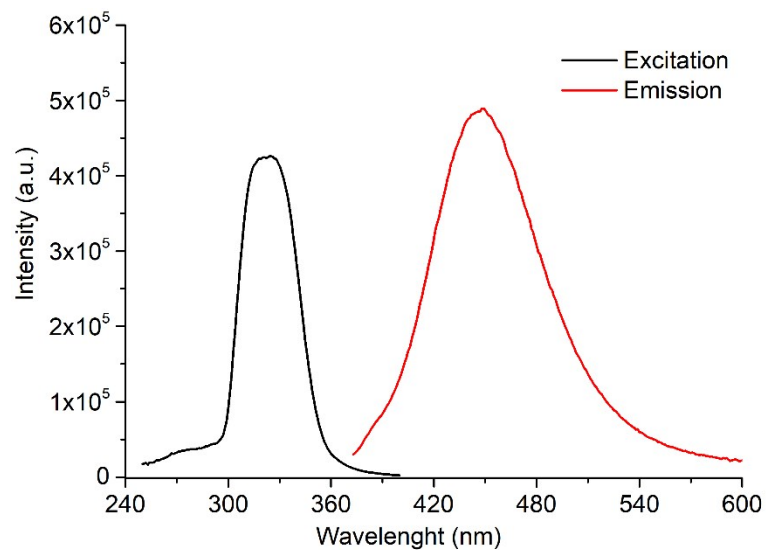

Fig. S4. The excitation and emission spectra of  $H_3TPO$  molecule.

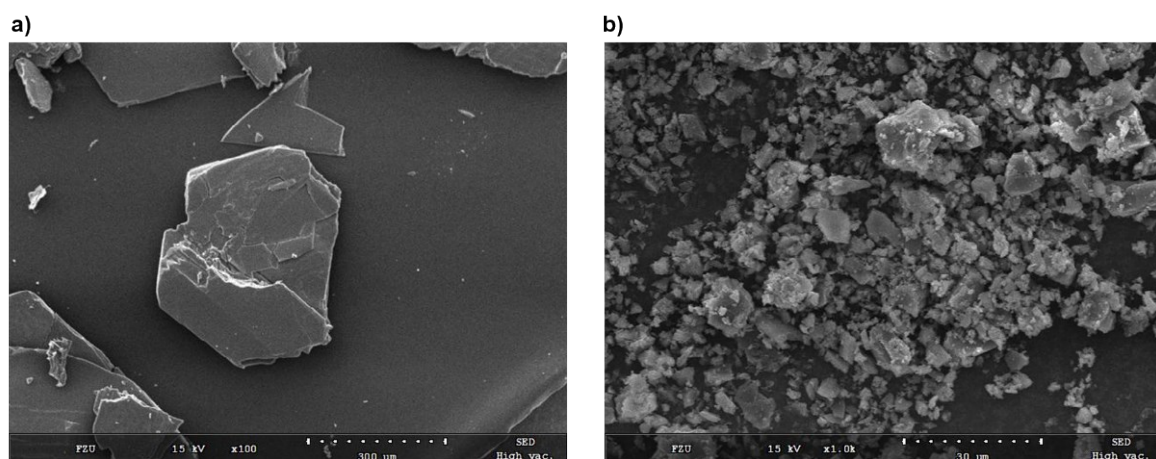

Fig. S5. The SEM images of compound  $1-\beta$  before (a) and after (b) grinding.



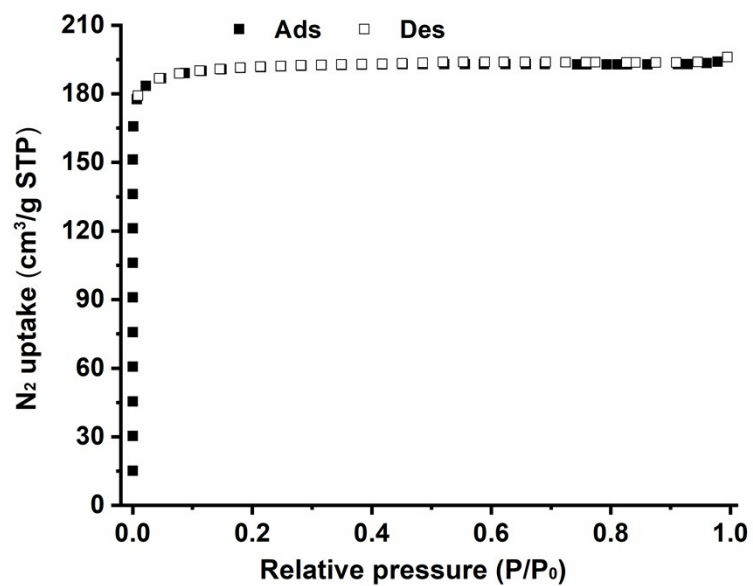

Fig. S6. The N<sub>2</sub> sorption isotherms of compound 1-β at 77 K after grinding.

#### Section S4 References

S1 A. Tézé, G. Hervé, R. G. Finke, D. K. Lyon, *Inorg. Synth.* **1990**, *27*, 85-135.
